# Supplementary material
Source: Research Square preprint supplement (doi:10.21203/rs.3.rs-9112827/v1)
Supplement: Supplementary file 1 [file 71a445976f0c05fc19f206ea.docx]

# Statistical Analysis: Comparative Efficacy of Non-Pharmacological Pain Management Interventions in Neonates

# The deidentified data is available on request

# R 4.5.1

# Load packages

required_packages <- c("dplyr", "car", "emmeans", "ggplot2",

"tidyr", "scales")

for (pkg in required_packages) {

if (!requireNamespace(pkg, quietly = TRUE)) {

install.packages(pkg, repos = "https://cloud.r-project.org")

}

}

library(dplyr)

library(car)

library(emmeans)

library(ggplot2)

library(tidyr)

library(scales)

theme_set(theme_minimal(base_size = 12))

group_colors <- c("Breastfeeding" = "#2ecc71",

"Kangaroo Mother care" = "#3498db",

"Oral Dextrose" = "#e74c3c")

# Load data

df <- read.csv("final/master-data.csv")

# Clean data

df <- df %>%

mutate(

intervention = factor(intervention),

LBW = ifelse(birth_weight_grams == "<2500", 1, 0),

LBW_factor = factor(LBW, labels = c("Normal (>=2500g)", "LBW (<2500g)")),

AgeGroup = factor(ifelse(age_days < 7, "<7 days", ">=7 days")),

sex = factor(sex),

Age = age_days,

NIPS_0sec = nips_0_sec,

NIPS_2sec = nips_2_sec,

NIPS_10sec = nips_10_sec,

NIPS_120sec = nips_120_sec,

RecoveryTime = nips_return_to_normal_sec,

EffectiveRelief = factor(ifelse(NIPS_10sec <= 3, "Yes", "No")), # NIPS <= 3

CompleteRelief = factor(ifelse(NIPS_10sec == 0, "Yes", "No")) # NIPS = 0

)

# Baseline characteristics

cat("=== BASELINE CHARACTERISTICS ===\n\n")

age_summary <- df %>%

group_by(intervention) %>%

summarise(n = n(), mean = round(mean(Age), 2), sd = round(sd(Age), 2), .groups = "drop")

print(age_summary)

age_chi <- chisq.test(table(df$intervention, df$AgeGroup))

sex_chi <- chisq.test(table(df$intervention, df$sex))

bw_chi <- chisq.test(table(df$intervention, df$LBW_factor))

cat("\nAge group p:", format.pval(age_chi$p.value), "\n")

cat("Sex p:", round(sex_chi$p.value, 3), "\n")

cat("Birth weight p:", format.pval(bw_chi$p.value), "\n")

# Clinical conditions - Table 1

cat("\n=== CLINICAL CONDITION ===\n")

# Analyse clinical conditions with Fisher's exact test

analyze_condition <- function(data, condition_col, condition_name) {

tbl <- table(data$intervention, data[[condition_col]])

# Check if condition has any "Yes" values

if (!"Yes" %in% colnames(tbl)) {

return(NULL) # Skip if zero cases

}

# Get counts per group

yes_counts <- tbl[, "Yes"]

total_counts <- rowSums(tbl)

props <- round(yes_counts / total_counts * 100, 1)

# Skip if all zeros

if (sum(yes_counts) == 0) {

return(NULL)

}

# Use Fisher's exact test if count < 5

expected <- chisq.test(tbl)$expected

if (any(expected < 5)) {

test <- fisher.test(tbl)

test_name <- "Fisher's exact"

p_val <- test$p.value

} else {

test <- chisq.test(tbl)

test_name <- "Chi-square"

p_val <- test$p.value

}

cat("\n", condition_name, ":\n", sep = "")

cat(" Breastfeeding:", yes_counts["Breastfeeding"], "(", props["Breastfeeding"], "%)\n")

cat(" KMC:", yes_counts["Kangaroo Mother care"], "(", props["Kangaroo Mother care"], "%)\n")

cat(" Oral Dextrose:", yes_counts["Oral Dextrose"], "(", props["Oral Dextrose"], "%)\n")

cat(" ", test_name, " p:", round(p_val, 3), "\n", sep = "")

return(list(name = condition_name, props = props, p = p_val, test = test_name))

}

# Analyze clinical conditions

analyze_condition(df, "respiratory_distress", "Respiratory distress")

analyze_condition(df, "neonatal_jaundice", "Neonatal jaundice")

analyze_condition(df, "refusal_to_feed", "Refusal to feed")

analyze_condition(df, "diabetic_mother", "Infant of diabetic mother")

analyze_condition(df, "lethargy", "Lethargy")

analyze_condition(df, "seizures", "Seizures")

analyze_condition(df, "cyanosis", "Cyanosis")

analyze_condition(df, "maternal_opioid_use", "Maternal opioid use")

# Primary outcome - unadjusted

cat("\n=== PRIMARY OUTCOME (UNADJUSTED) ===\n\n")

nips2_summary <- df %>%

group_by(intervention) %>%

summarise(n = n(), mean = round(mean(NIPS_2sec), 2), sd = round(sd(NIPS_2sec), 2), .groups = "drop")

cat("NIPS at 2 seconds:\n")

print(nips2_summary)

nips2_anova <- aov(NIPS_2sec ~ intervention, data = df)

cat("ANOVA p:", round(summary(nips2_anova)[[1]][1,5], 3), "\n")

nips10_summary <- df %>%

group_by(intervention) %>%

summarise(n = n(), mean = round(mean(NIPS_10sec), 2), sd = round(sd(NIPS_10sec), 2), .groups = "drop")

cat("\nNIPS at 10 seconds:\n")

print(nips10_summary)

nips10_anova <- aov(NIPS_10sec ~ intervention, data = df)

cat("ANOVA p:", round(summary(nips10_anova)[[1]][1,5], 3), "\n")

recovery_summary <- df %>%

group_by(intervention) %>%

summarise(n = n(), mean = round(mean(RecoveryTime), 2), sd = round(sd(RecoveryTime), 2), .groups = "drop")

cat("\nRecovery time (seconds):\n")

print(recovery_summary)

recovery_anova <- aov(RecoveryTime ~ intervention, data = df)

cat("ANOVA p:", round(summary(recovery_anova)[[1]][1,5], 3), "\n")

# Pairwise comparisons

cat("\n=== PAIRWISE COMPARISONS ===\n\n")

bf_rec <- df$RecoveryTime[df$intervention == "Breastfeeding"]

od_rec <- df$RecoveryTime[df$intervention == "Oral Dextrose"]

t_rec <- t.test(bf_rec, od_rec)

cat("Recovery time t-test (BF vs OD) p:", round(t_rec$p.value, 3), "\n")

# ANCOVA

cat("\n=== ANCOVA ===\n")

model_2sec <- lm(NIPS_2sec ~ intervention + Age + LBW_factor, data = df)

ancova_2sec <- Anova(model_2sec, type = 2)

emm_2sec <- emmeans(model_2sec, "intervention")

cat("\nNIPS at 2 seconds:\n")

print(ancova_2sec)

cat("\nAdjusted means:\n")

print(summary(emm_2sec))

model_10sec <- lm(NIPS_10sec ~ intervention + Age + LBW_factor, data = df)

ancova_10sec <- Anova(model_10sec, type = 2)

emm_10sec <- emmeans(model_10sec, "intervention")

cat("\nNIPS at 10 seconds:\n")

print(ancova_10sec)

cat("\nAdjusted means:\n")

print(summary(emm_10sec))

# Categorical outcomes

cat("\n=== CATEGORICAL OUTCOMES ===\n\n")

eff_table <- table(df$intervention, df$EffectiveRelief)

eff_props <- round(prop.table(eff_table, margin = 1) * 100, 1)

eff_chi <- chisq.test(eff_table)

cat("Effective Pain Relief (NIPS<=3 at 10 sec):\n")

print(eff_props)

cat("Chi-square p:", round(eff_chi$p.value, 3), "\n")

comp_table <- table(df$intervention, df$CompleteRelief)

comp_props <- round(prop.table(comp_table, margin = 1) * 100, 1)

comp_chi <- chisq.test(comp_table)

cat("\nComplete Pain Relief (NIPS=0 at 10 sec):\n")

print(comp_props)

cat("Chi-square p:", round(comp_chi$p.value, 3), "\n")

# Figures

dir.create("figures", showWarnings = FALSE)

# Pain trajectory plot

trajectory_data <- df %>%

select(intervention, NIPS_0sec, NIPS_2sec, NIPS_10sec, NIPS_120sec) %>%

pivot_longer(cols = starts_with("NIPS"), names_to = "TimePoint", values_to = "NIPS") %>%

mutate(

Time = case_when(

TimePoint == "NIPS_0sec" ~ 0, TimePoint == "NIPS_2sec" ~ 2,

TimePoint == "NIPS_10sec" ~ 10, TimePoint == "NIPS_120sec" ~ 120

),

TimeLabel = factor(Time, levels = c(0, 2, 10, 120),

labels = c("Baseline", "2 sec", "10 sec", "120 sec"))

) %>%

group_by(intervention, TimeLabel, Time) %>%

summarise(mean = mean(NIPS), se = sd(NIPS) / sqrt(n()), .groups = "drop")

p1 <- ggplot(trajectory_data, aes(x = TimeLabel, y = mean, color = intervention, group = intervention)) +

geom_line(linewidth = 1.2) + geom_point(size = 3) +

geom_errorbar(aes(ymin = mean - se, ymax = mean + se), width = 0.2) +

scale_color_manual(values = group_colors) +

labs(title = "NIPS score trajectory after heel lance", x = "Time (seconds)", y = "Mean NIPS score") +

theme(legend.position = "bottom") + ylim(0, 4)

ggsave("figures/fig_pain_trajectory.jpeg", p1, width = 8, height = 6, dpi = 300)

ggsave("figures/fig_pain_trajectory.pdf", p1, width = 8, height = 6)

# ANCOVA comparison plot

unadj_means <- df %>%

group_by(intervention) %>%

summarise(NIPS_2sec = mean(NIPS_2sec), NIPS_10sec = mean(NIPS_10sec), .groups = "drop") %>%

pivot_longer(cols = c(NIPS_2sec, NIPS_10sec), names_to = "TimePoint", values_to = "Mean") %>%

mutate(Type = "Unadjusted")

adj_2sec <- as.data.frame(summary(emm_2sec)) %>%

select(intervention, emmean) %>% mutate(TimePoint = "NIPS_2sec", Mean = emmean, Type = "Adjusted") %>% select(-emmean)

adj_10sec <- as.data.frame(summary(emm_10sec)) %>%

select(intervention, emmean) %>% mutate(TimePoint = "NIPS_10sec", Mean = emmean, Type = "Adjusted") %>% select(-emmean)

ancova_plot_data <- bind_rows(unadj_means, adj_2sec, adj_10sec) %>%

mutate(

TimePoint = factor(TimePoint, levels = c("NIPS_2sec", "NIPS_10sec"),

labels = c("2 seconds", "10 seconds")),

Type = factor(Type, levels = c("Unadjusted", "Adjusted"))

)

p2 <- ggplot(ancova_plot_data, aes(x = intervention, y = Mean, fill = Type)) +

geom_bar(stat = "identity", position = position_dodge(width = 0.8), width = 0.7) +

geom_text(aes(label = round(Mean, 2)), position = position_dodge(width = 0.8), vjust = -0.5, size = 3.5) +

facet_wrap(~TimePoint) +

scale_fill_manual(values = c("Unadjusted" = "#3498db", "Adjusted" = "#e74c3c")) +

labs(title = "ANCOVA: Unadjusted vs adjusted mean NIPS scores",

subtitle = "Adjusted for age and birth weight",

x = "", y = "Mean NIPS score") +

theme(legend.position = "bottom", axis.text.x = element_text(angle = 15, hjust = 1))

ggsave("figures/fig_ancova_comparison.jpeg", p2, width = 10, height = 6, dpi = 300)

ggsave("figures/fig_ancova_comparison.pdf", p2, width = 10, height = 6)

# Age scatter plot

p3 <- ggplot(df, aes(x = Age, y = NIPS_2sec, color = intervention)) +

geom_jitter(alpha = 0.5, width = 0.5, height = 0.2, size = 2) +

geom_smooth(method = "lm", se = FALSE, linewidth = 1.2) +

scale_color_manual(values = group_colors) +

labs(title = "Age vs peak pain response", x = "Age (days)", y = "NIPS at 2 seconds") +

theme(legend.position = "bottom")

ggsave("figures/fig_scatter_regression.jpeg", p3, width = 9, height = 6, dpi = 300)

ggsave("figures/fig_scatter_regression.pdf", p3, width = 9, height = 6)

# Pain relief categories

relief_data <- df %>%

group_by(intervention) %>%

summarise(

`Complete (NIPS=0)` = sum(CompleteRelief == "Yes") / n() * 100,

`Effective (NIPS 1-3)` = sum(EffectiveRelief == "Yes" & CompleteRelief == "No") / n() * 100,

`Ineffective (NIPS >3)` = sum(EffectiveRelief == "No") / n() * 100,

.groups = "drop"

) %>%

pivot_longer(cols = -intervention, names_to = "Relief", values_to = "Percentage") %>%

mutate(Relief = factor(Relief, levels = c("Complete (NIPS=0)", "Effective (NIPS 1-3)", "Ineffective (NIPS >3)")))

p4 <- ggplot(relief_data, aes(x = intervention, y = Percentage, fill = Relief)) +

geom_bar(stat = "identity", position = "stack", width = 0.5) +

geom_text(aes(label = ifelse(Percentage > 0, paste0(round(Percentage, 1), "%"), "")),

position = position_stack(vjust = 0.5), size = 3.5, color = "white") +

scale_fill_manual(values = c("Complete (NIPS=0)" = "#27ae60",

"Effective (NIPS 1-3)" = "#f39c12",

"Ineffective (NIPS >3)" = "#c0392b")) +

labs(title = "Pain relief at 10 seconds", x = "", y = "Percentage") +

theme(legend.position = "bottom", axis.text.x = element_text(angle = 15, hjust = 1))

ggsave("figures/fig_pain_relief_categories.jpeg", p4, width = 8, height = 6, dpi = 300)

ggsave("figures/fig_pain_relief_categories.pdf", p4, width = 8, height = 6)

# Recovery boxplot

p5 <- ggplot(df, aes(x = intervention, y = RecoveryTime, fill = intervention)) +

geom_boxplot(alpha = 0.7, outlier.shape = 21) +

geom_jitter(width = 0.2, alpha = 0.3, size = 1) +

scale_fill_manual(values = group_colors) +

labs(title = "Recovery time distribution", x = "", y = "Recovery time (seconds)") +

theme(legend.position = "none", axis.text.x = element_text(angle = 15, hjust = 1))

ggsave("figures/fig_recovery_boxplot.jpeg", p5, width = 8, height = 6, dpi = 300)

ggsave("figures/fig_recovery_boxplot.pdf", p5, width = 8, height = 6)

# Session info

cat("\n=== SESSION INFO ===\n")

cat("Analysis completed:", format(Sys.time(), "%Y-%m-%d %H:%M:%S"), "\n")

sessionInfo()
